# Supplementary material for: A Partial Gene Deletion of SLC45A2 Causes Oculocutaneous Albinism in Doberman Pinscher Dogs
Source: PLoS One. 2014 Mar 19;9(3):e92127. doi: 10.1371/journal.pone.0092127 (PMC3960214; doi:10.1371/journal.pone.0092127)
Supplement: Table S3 — Extent of linkage disequilibrium surrounding SLC45A2. (XLSX) [file pone.0092127.s007.xlsx]

## Sheet: Sheet1
Supplemental Table 3. Extent of linkage disequilibrium surrounding SLC45A2
Distance1		7 Mb U		6 Mb U		5 Mb U		2 Mb U		1 Mb U		600 kb U		192 kb U		46 kb D		1 Mb D		2 Mb D		3 Mb D		4 Mb D		5 Mb D
Amplicon Size2		320		203		345		241		270		520		345		398		287		440		512		520		432
Allele		1	2	1	2	1	2	1	2	1	2	1	2	1	2	1	2	1	2	1	2	1	2	1	2	1	2
	Dog
WDPs	1	316	319	192	192	348	352	245	245	275	275	412	416	215	219	403	403	279	283	428	428	519	550	490	556	440	440
	2	319	319	192	192	349	349	245	245	NC	NC	412	412	219	219	403	403	279	279	428	428	550	550	490	490	440	440
	3	319	319	192	192	348	348	245	245	275	275	412	412	219	219	403	403	275	279	428	428	550	550	490	490	440	440
	4	319	319	192	192	349	353	245	245	275	275	412	412	219	219	403	403	275	279	428	428	550	550	490	490	421	440
	5	298	323	189	191	348	348	245	245	275	275	408	412	219	219	403	403	279	279	428	428	550	550	490	490	421	440
	6	319	319	192	192	349	349	245	245	271	275	412	412	219	219	403	403	275	279	428	428	550	550	490	490	421	440
	7	297.5	319	188	192	348	348	245	245	275	275	NC	NC	219	219	403	403	NC	NC	428	428	550	550	490	490	421	440
	8	319	319	191	191	348	348	245	249	275	275	412	412	219	219	403	403	279	279	428	428	550	550	490	490	421	440
	9	319	323	192	192	348	348	245	245	275	275	412	412	219	219	403	403	279	283	428	428	550	550	490	490	421	421
	10	319	319	192	192	348	348	245	245	NC	NC	412	412	219	219	403	403	279	279	431	431	550	550	490	490	421	421
	11	319	319	192	192	349	349	245	245	NC	NC	412	412	215	215	403	403	279	279	428	428	550	550	490	490	425	440
	12	319	323	192	192	348	348	245	245	275	275	412	412	219	219	403	403	279	279	428	428	550	550	491	491	421	421
SDPs	1	NT	NT	NT	NT	315	361	233	245	NT	NT	NT	NT	348	357	391	395	NT	NT	NT	NT	519	551	490	539	NC	NC
	2	NT	NT	NT	NT	357	361	233	245	NT	NT	NT	NT	NC	NC	481	481	NT	NT	NT	NT	519	551	485	494	423	438
	3	NT	NT	NT	NT	319	361	240	253	NT	NT	NT	NT	357	365	379	391	NT	NT	NT	NT	520	572	490	495	422	422
	4	NT	NT	NT	NT	NC	NC	233	241	NT	NT	NT	NT	215	215	481	481	NT	NT	NT	NT	520	551	487	495	NC	NC
	5	NT	NT	NT	NT	315	319	NC	NC	NT	NT	NT	NT	215	224	395	481	NT	NT	NT	NT	519	519	490	495	406	422
	6	NT	NT	NT	NT	319	386	245	253	NT	NT	NT	NT	214	218	NC	NC	NT	NT	NT	NT	519	519	491	496	406	422
	7	NT	NT	NT	NT	315	356	232	241	NT	NT	NT	NT	219	265	379	387	NT	NT	NT	NT	531	531	487	491	422	422
	8	NT	NT	NT	NT	356	386	233	233	NT	NT	NT	NT	215	219	387	387	NT	NT	NT	NT	525	572	487	490	407	423
	9	NT	NT	NT	NT	315	356	233	242	NT	NT	NT	NT	219	356	391	395	NT	NT	NT	NT	519	519	490	495	423	423
	10	NT	NT	NT	NT	307	356	NC	NC	NT	NT	NT	NT	214	356	387	485	NT	NT	NT	NT	519	551	493	498	NC	NC
Light green, most common allele in WDPs. Yellow highlight, (+/-) 1 repeat difference in allele size. Orange highlight in WDPs indicate a presumed recombination event. Additional colors indicate a larger allele size difference. NT, marker not tested and NC, failed analysis
1. Approximate distance from the MS marker to SLC45A2. U, upstream and D, downstream. Mb, megabase and kb, kilobase
2. Amplicon size as predicted by the UCSC Genome Browser canine reference genome, CanFam2.0
