# Supplementary material for: A Partial Gene Deletion of SLC45A2 Causes Oculocutaneous Albinism in Doberman Pinscher Dogs
Source: PLoS One. 2014 Mar 19;9(3):e92127. doi: 10.1371/journal.pone.0092127 (PMC3960214; doi:10.1371/journal.pone.0092127)
Supplement: Table S5 — Breeds tested for SLC45A2 deletion. (XLSX) [file pone.0092127.s009.xlsx]

## Sheet: Sheet1
Supplemental Table 5. Breeds tested for SLC45A2 deletion
Breed	# tested	# homozygous without deletion1	# homozygous with deletion
WDPs	16	0	16
SDPs	25	23	0
Golden Retriever	10	10	0
Collie	8	8	0
Entlebucher	8	8	0
Italian Greyhound	8	8	0
Dachshund	7	7	0
Cairn Terrier	6	6	0
Papillon	6	6	0
Briard	1	1	0
1. Two SDPs were heterozygotes for the deletion
