# Supplementary material for: A Partial Gene Deletion of SLC45A2 Causes Oculocutaneous Albinism in Doberman Pinscher Dogs
Source: PLoS One. 2014 Mar 19;9(3):e92127. doi: 10.1371/journal.pone.0092127 (PMC3960214; doi:10.1371/journal.pone.0092127)
Supplement: Table S6 — List of genes within the ∼10 Mb region of homozygosity. (XLSX) [file pone.0092127.s010.xlsx]

## Sheet: Sheet1
Supplemental Table 6. List of genes within the ~10 Mb region of homozygosity
Gene	Canine Location1	Human Location2
CDH10	chr4:79,151,115-79,200,445	chr5:24,487,208-24,645,085
CDH6	chr4:79,145,587-79,269,032	chr5:31,193,761-31,329,253
DROSHA	chr4:78,970,587-79,092,716	chr5:31,400,601-31,532,282
C5orf22	chr4:78,951,110-78,970,274	chr5:31,532,372-31,555,165
PDZD2	chr4:78,535,507-78,764,417	chr5:31,799,030-32,111,038
GOLPH3	chr4:78,506,710-78,524,157	chr5:32,124,823-32,174,425
MTMR12	chr4:78,346,563-78,420,493	chr5:32,227,110-32,313,114
ZFR	chr4:78,237,429-78,324,653	chr5:32,354,455-32,444,844
SUB1	chr4:78,130,270-78,150,839	chr5:32,585,604-32,604,185
NPR3	chr4:77,991,440-78,060,124	chr5:32,710,742-32,791,830
TARS	chr4:77,411,281-77,436,844	chr5:33,440,801-33,468,196
ADAMTS12	chr4:77,083,905-77,383,090	chr5:33,527,286-33,892,124
RXFP3	chr4:77,067,560-77,069,644	chr5:33,936,490-33,939,023
SLC45A2	chr4:77,035,754-77,063,131	chr5:33,944,720-33,984,780
AMACR	chr4:77,011,214-77,032,375	chr5:33,987,090-34,008,220
C1QTNF3	chr4:77,001,264-77,006,569	chr5:34,017,962-34,043,371
C1QTNF3-AMACR	chr4:76,989,621-77,032,375	chr5:33,987,090-34,124,633
RAI14	chr4:76,656,407-76,771,268	chr5:34,656,432-34,832,717
TTC23L	chr4:76,594,110-76,648,142	chr5:34,839,268-34,899,564
RAD1	chr4:76,581,510-76,591,081	chr5:34,905,365-34,915,731
BRIX1	chr4:76,571,330-76,581,388	chr5:34,915,819-34,925,787
DNAJC21	chr4:76,541,804-76,567,955	chr5:34,929,697-34,959,069
AGXT2	chr4:76,488,102-76,523,736	chr5:34,998,205-35,048,240
PRLR	chr4:76,306,354-76,478,666	chr5:35,048,860-35,118,224
SPEF2	chr4:75,896,196-76,060,485	chr5:35,617,988-35,671,676
IL7R	chr4:75,829,814-75,861,031	chr5:35,856,976-35,879,705
CAPSL	chr4:75,782,026-75,809,528	chr5:35,904,397-35,938,881
UGT3A1	chr4:75,680,306-75,711,712	chr5:35,953,190-35,991,535
UGT3A2	chr4:75,639,878-75,656,733	chr5:36,035,118-36,067,023
LMBRD2	chr4:75,583,576-75,622,560	chr5:36,103,413-36,152,015
SKP2	chr4:75,549,939-75,583,377	chr5:36,152,144-36,184,142
NADK2	chr4:75,493,984-75,538,248	chr5:36,192,690-36,241,493
RANBP3L	chr4:75,445,675-75,489,294	chr5:36,249,103-36,302,011
SLC1A3	chr4:75,133,070-75,211,061	chr5:36,606,456-36,688,436
NIPBL	chr4:74,780,286-74,977,934	chr5:36,876,860-37,065,921
C5orf42	chr4:74,634,186-74,765,086	chr5:37,106,329-37,249,530
NUP155	chr4:74,537,597-74,605,737	chr5:37,291,734-37,371,228
WDR70	chr4:74,227,086-74,528,013	chr5:37,379,411-37,752,774
GDNF	chr4:74,169,547-74,190,497	chr5:37,812,778-37,839,782
EGFLAM	chr4:73,589,205-73,772,519	chr5:38,258,510-38,465,582
LIFR	chr4:73,526,528-73,573,692	chr5:38,475,064-38,556,748
OSMR	chr4:73,236,387-73,264,819	chr5:38,845,959-38,886,759
RICTOR	chr4:73,133,942-73,210,731	chr5:38,938,022-39,074,510
FYB	chr4:72,982,087-73,074,361	chr5:39,105,353-39,219,680
1. Genomic location in respect to the UCSC Genome Browser canine reference genome, CanFam2.0
2. Genomic location in respect to the UCSC Genome Browser human reference genome, GRCh37
